# Supplementary material for: Cryptic Genetic Diversity within the Anopheles nili group of Malaria Vectors in the Equatorial Forest Area of Cameroon (Central Africa)
Source: PubMed Central journal article supplement (PMC3597579; doi:10.1371/journal.pone.0058862), 2013-03-14
Supplement: pone.0058862.s001.pdf [file pone.0058862.s001.pdf]

|          |     |     |     |     |     |     |     |     |     |     |     |     |     |     |     |     |     |     |     |     |     |     |     |     |     |      |
|----------|-----|-----|-----|-----|-----|-----|-----|-----|-----|-----|-----|-----|-----|-----|-----|-----|-----|-----|-----|-----|-----|-----|-----|-----|-----|------|
|          |     |     |     | 111 | 111 | 111 | 122 | 222 | 222 | 223 | 333 | 333 | 333 | 444 | 444 | 444 | 455 | 555 | 555 | 556 | 666 | 666 | 666 | 777 | 777 | 777  |
|          | 123 | 456 | 789 | 012 | 345 | 678 | 901 | 234 | 567 | 890 | 123 | 456 | 789 | 012 | 345 | 678 | 901 | 234 | 567 | 890 | 123 | 456 | 789 | 012 | 345 | 678  |
| AN (AK)  | CTA | CTA | GAT | GGT | TCG | ATT | GGT | CTT | TCG | CCC | CTA | TGC | CCA | ATT | CTG | ACA | ATC | GAT | TTG | CAC | GTC | AGA | ATT | GCT | TCG | GTC  |
| AN (NK)  | ... | ... | ... | ... | ... | ... | ... | ... | ... | ... | ... | ... | ... | ... | ... | ... | ... | ... | ... | ... | ... | ... | ... | ... | ... | ...  |
| AN (KT)  | ... | ... | ... | ... | ... | ... | ... | ... | ... | ... | ... | ... | ... | ... | ... | ... | ... | ... | ... | ... | ... | ... | ... | ... | ... | ...  |
| AN (MOA) | ... | ... | ... | ... | ... | ... | ... | ... | ... | ... | ... | ... | ... | ... | ... | ... | ... | ... | ... | ... | ... | ... | ... | ... | ... | ...  |
| AN (MOB) | ... | ... | ... | ... | ... | ... | ... | ... | ... | ... | ... | ... | ... | ... | ... | ... | ... | ... | ... | ... | ... | ... | ... | ... | ... | ...  |
| AN (EK)  | ... | ... | ... | ... | ... | ... | ... | ... | ... | ... | ... | ... | ... | ... | ... | ... | ... | ... | ... | ... | ... | ... | ... | ... | ... | ...  |
| AC (AE)  | ... | ... | ... | ... | ... | ... | ... | ... | ... | ... | ... | ... | ... | ... | ... | ... | ... | ... | ... | ... | ... | ... | ... | ... | ... | ...  |
| AO (NY)  | ... | ... | ... | ... | ... | ... | ... | ... | ... | ... | ... | ... | ... | ... | ... | ... | ... | ... | ... | ... | ... | ... | ... | ... | ... | ...  |
| AS (MB)  | ... | ... | ... | ... | ... | ... | ... | ... | ... | ... | ... | ... | ... | ... | ... | ... | ... | ... | ... | ... | ... | ... | ... | ... | ... | ...  |
|          |     |     |     |     |     |     |     |     | 111 | 111 | 111 | 111 | 111 | 111 | 111 | 111 | 111 | 111 | 111 | 111 | 111 | 111 | 111 | 111 | 111 | 111  |
|          | 788 | 888 | 888 | 889 | 999 | 999 | 999 | 000 | 000 | 000 | 011 | 111 | 111 | 112 | 222 | 222 | 222 | 333 | 333 | 333 | 344 | 444 | 444 | 445 | 555 | 555  |
|          | 901 | 234 | 567 | 890 | 123 | 456 | 789 | 012 | 345 | 678 | 901 | 234 | 567 | 890 | 123 | 456 | 789 | 012 | 345 | 678 | 901 | 234 | 567 | 890 | 123 | 456  |
| AN (AK)  | CTC | CAT | CAG | GGT | TTC | CCC | TGA | CTT | CAA | CCT | GAT | CAG | GCA | TAG | TTC | ACC | ATC | TTT | CGG | GTC | GCA | TCC | TAC | GCA | CTC | GGG  |
| AN (NK)  | ... | ... | ... | ... | ... | ... | ... | ... | ... | ... | ... | ... | ... | ... | ... | ... | ... | ... | ... | ... | ... | ... | ... | ... | ... | ...  |
| AN (KT)  | ... | ... | ... | ... | ... | ... | ... | ... | ... | ... | ... | ... | ... | ... | ... | ... | ... | ... | ... | ... | ... | ... | ... | ... | ... | ...  |
| AN (MOA) | ... | ... | ... | ... | ... | ... | ... | ... | ... | ... | ... | ... | ... | ... | ... | ... | ... | ... | ... | ... | ... | ... | ... | ... | ... | ...  |
| AN (MOB) | ... | ... | ... | ... | ... | ... | ... | ... | ... | ... | ... | ... | ... | ... | ... | ... | ... | ... | ... | ... | ... | ... | ... | ... | ... | ...  |
| AN (EK)  | ... | ... | ... | ... | ... | ... | ... | ... | ... | ... | ... | ... | ... | ... | ... | ... | ... | ... | ... | ... | ... | ... | ... | ... | ... | ...  |
| AC (AE)  | ... | ... | ... | ... | ... | ... | ... | ... | ... | ... | ... | ... | ... | ... | ... | ... | ... | ... | ... | ... | ... | ... | ... | ... | ... | ...  |
| AO (NY)  | ... | ... | ... | ... | ... | ... | ... | ... | ... | ... | ... | ... | ... | ... | ... | ... | ... | ... | ... | ... | ... | ... | ... | ... | ... | ...  |
| AS (MB)  | ... | ... | ... | ... | ... | ... | ... | ... | ... | ... | ... | ... | ... | ... | ... | ... | ... | ... | ... | ... | ... | ... | ... | ... | ... | ...  |
|          | 111 | 111 | 111 | 111 | 111 | 111 | 111 | 111 | 111 | 111 | 111 | 111 | 111 | 122 | 222 | 222 | 222 | 222 | 222 | 222 | 222 | 222 | 222 | 222 | 222 | 222  |
|          | 555 | 666 | 666 | 666 | 677 | 777 | 777 | 778 | 888 | 888 | 888 | 999 | 999 | 999 | 900 | 000 | 000 | 001 | 111 | 111 | 111 | 222 | 222 | 222 | 233 | 333  |
|          | 789 | 012 | 345 | 678 | 901 | 234 | 567 | 890 | 123 | 456 | 789 | 012 | 345 | 678 | 901 | 234 | 567 | 890 | 123 | 456 | 789 | 012 | 345 | 678 | 901 | 234  |
| AN (AK)  | GGA | TGC | CCG | CTG | GGT | GGC | GCA | CGT | GTG | ACC | GCA | CGC | CAG | CCC | GTA | CCG | GGG | CAC | CCT | GGG | ATG | GAG | GGA | GGC | GTC | CGT  |
| AN (NK)  | ... | ... | ... | ... | ... | ... | ... | ... | ... | ... | ... | ... | ... | ... | ... | ... | ... | ... | ... | ... | ... | ... | ... | ... | ... | ...  |
| AN (KT)  | ... | ... | ... | ... | ... | ... | ... | ... | ... | ... | ... | ... | ... | ... | ... | ... | ... | ... | ... | ... | ... | ... | ... | ... | ... | ...  |
| AN (MOA) | ... | ... | ... | ... | ... | ... | ... | ... | ... | ... | ... | ... | ... | ... | ... | ... | ... | ... | ... | ... | ... | ... | ... | ... | ... | ...  |
| AN (MOB) | ... | ... | ... | ... | ..C | ... | ... | ... | ... | ... | ... | ... | ... | ... | ..G | A.. | ... | ... | ... | ... | ... | ... | ... | ... | ... | ..A. |
| AN (EK)  | ... | ... | ... | ... | ..C | ... | ... | T.. | ... | ... | ... | ... | ... | ... | ..G | A.. | ... | ... | ... | ... | ... | ... | ... | ... | ... | ..A. |
| AC (AE)  | ... | ... | ... | ... | ... | ... | ... | ... | ... | ... | ... | ... | ... | ... | ... | ... | ... | ... | ... | ... | ... | ... | ... | ... | ... | ...  |
| AO (NY)  | ... | ... | ... | ... | ... | ... | ... | ... | ... | ... | ... | ... | ... | ... | ... | ... | ... | ... | ... | ... | ... | ... | ... | ... | ... | ...  |
| AS (MB)  | ... | ... | ... | ... | ... | ... | ... | ... | ... | ... | ... | ... | ... | ... | ... | ... | ... | ... | ... | ... | ... | ... | ... | ... | ... | ...  |

**Figure S1.**

|          |     |     |     |     |     |     |     |     |     |     |     |     |     |     |     |     |     |     |     |     |     |     |     |     |     |     |     |
|----------|-----|-----|-----|-----|-----|-----|-----|-----|-----|-----|-----|-----|-----|-----|-----|-----|-----|-----|-----|-----|-----|-----|-----|-----|-----|-----|-----|
|          | 222 | 222 | 222 | 222 | 222 | 222 | 222 | 222 | 222 | 222 | 222 | 222 | 222 | 222 | 222 | 222 | 222 | 222 | 222 | 222 | 222 | 222 | 223 | 333 | 333 | 333 | 333 |
|          | 333 | 334 | 444 | 444 | 444 | 555 | 555 | 555 | 566 | 666 | 666 | 667 | 777 | 777 | 777 | 888 | 888 | 888 | 899 | 999 | 999 | 999 | 990 | 000 | 000 | 000 | 111 |
|          | 567 | 890 | 123 | 456 | 789 | 012 | 345 | 678 | 901 | 234 | 567 | 890 | 123 | 456 | 789 | 012 | 345 | 678 | 901 | 234 | 567 | 890 | 123 | 456 | 789 | 012 |     |
| AN (AK)  | GGC | TTG | CGC | CAA | GCG | CGC | CCC | CGT | AAT | CCC | GCG | ACG | AAA | CCG | TCT | CGA | GTT | GTC | TGC | GCC | TGT | GGG | GTT | CTC | TCT | CGC |     |
| AN (NK)  | ... | ... | ... | ... | ... | ... | ... | ... | ... | ... | ... | ... | ... | ... | ... | ... | ... | ... | ... | ... | ... | ... | ... | ... | ... | ... |     |
| AN (KT)  | ... | ... | ... | ... | ... | ... | ... | ... | ... | ... | ... | ... | ... | ... | ... | ... | ... | ... | ... | ... | ... | ... | ... | ... | GG- | TAT |     |
| AN (MOA) | ... | ... | ... | ... | ... | ... | ... | ... | ... | ... | ... | ... | ... | ... | ... | ... | ... | ... | ... | ... | ... | ... | ... | ... | GG- | TAT |     |
| AN (MOB) | ... | ... | .A. | ... | ... | ... | ... | ... | ... | ... | ... | ... | ... | ... | ... | ... | ... | ... | ... | ... | ... | ... | ... | ... | GG- | T.T |     |
| AN (EK)  | ... | ... | .A. | ... | ... | ... | ... | ... | ... | ... | ... | ... | ... | ... | ... | ... | ... | ... | ... | ... | ... | ... | ... | ... | GG- | T.T |     |
| AC (AE)  | ... | ... | ... | ... | ... | ... | ... | ... | ... | ... | ... | ... | ... | ... | ... | ... | ... | ... | ... | ... | ... | ... | ... | ... | GG. | T.- |     |
| AO (NY)  | ... | ... | ... | ... | ... | ... | ... | ... | ... | ... | ... | ... | ... | ... | ... | ... | ... | ... | ... | ... | ... | ... | ... | ... | GG- | T.. |     |
| AS (MB)  | ... | ... | ... | ... | ... | ... | ... | ... | ... | ... | ... | ... | ... | ... | ... | ... | ... | ... | ... | ... | ... | ... | ... | ... | GTC | T.T |     |
|          | 333 | 333 | 333 | 333 | 333 | 333 | 333 | 333 | 333 | 333 | 333 | 333 | 333 | 333 | 333 | 333 | 333 | 333 | 333 | 333 | 333 | 333 | 333 | 333 | 3   |     |     |
|          | 111 | 111 | 122 | 222 | 222 | 223 | 333 | 333 | 333 | 444 | 444 | 444 | 455 | 555 | 555 | 556 | 666 | 666 | 666 | 777 | 777 | 777 | 788 | 8   |     |     |     |
|          | 345 | 678 | 901 | 234 | 567 | 890 | 123 | 456 | 789 | 012 | 345 | 678 | 901 | 234 | 567 | 890 | 123 | 456 | 789 | 012 | 345 | 678 | 901 | 2   |     |     |     |
| AN (AK)  | GGT | ATA | CTG | GGG | C-- | --- | GCA | AGC | --G | CCC | CAA | CAA | CCT | GGC | CCA | TTG | GCT | CGC | GCG | TAA | GAT | AGA | CTT | C   |     |     |     |
| AN (NK)  | ... | ... | ... | ... | --- | --- | ... | ... | --- | ... | ... | ... | ... | ... | ... | ... | ... | ... | ... | ... | ... | ... | ... | ... |     |     |     |
| AN (KT)  | AC. | GGG | GC. | ..C | .CA | CAC | .G. | T.. | GG. | T.. | GCG | .CC | .AA | C.. | ... | ... | ... | ... | ... | ... | ... | ... | ... | ... |     |     |     |
| AN (MOA) | AC. | GGG | GC. | ..C | TTG | --- | --- | --- | --- | ... | GCG | .CC | .AA | C.. | ... | ... | ... | ... | ... | ... | ... | ... | ... | ... |     |     |     |
| AN (MOB) | AC. | GGG | G.. | C.C | --- | --- | .G  | ... | ACA | ... | ... | .CG | --- | --- | ... | ... | ... | ... | ... | ... | ... | ... | ... | ... |     |     |     |
| AN (EK)  | AC. | TGG | G.. | C.C | --- | --- | .G  | T.. | GC. | ... | ... | .CG | .GC | --- | ... | ... | ... | ... | ... | ... | ... | ... | ... | ... |     |     |     |
| AC (AE)  | -C. | GGG | TC. | .AC | .CA | C-- | .G. | T.- | -G. | T.. | GC- | .C. | .GC | C.. | ... | ... | ... | ... | ... | ... | ... | ... | ... | ... |     |     |     |
| AO (NY)  | AC. | GGG | GC. | ..C | .CA | CAC | .G. | T.. | GG. | T.. | GCG | .CC | .AA | C.. | ... | ... | ... | ... | ... | ... | ... | ... | ... | ... |     |     |     |
| AS (MB)  | .C. | GGG | TC. | .AC | .CG | --- | .GC | ..- | -G. | T.. | GC- | .C. | .GC | C-- | --- | ... | ... | ... | ... | ... | ... | ... | ... | ... |     |     |     |

**Figure S1 (continued).**
