# Supplementary material for: Cryptic Genetic Diversity within the Anopheles nili group of Malaria Vectors in the Equatorial Forest Area of Cameroon (Central Africa)
Source: PubMed Central journal article supplement (PMC3597579; doi:10.1371/journal.pone.0058862), 2013-03-14
Supplement: pone.0058862.s002.pdf [file pone.0058862.s002.pdf]

|          |     |     |     |     |     |     |     |     |     |     |     |     |      |     |     |     |     |     |     |     |     |     |     |      |     |     |     |
|----------|-----|-----|-----|-----|-----|-----|-----|-----|-----|-----|-----|-----|------|-----|-----|-----|-----|-----|-----|-----|-----|-----|-----|------|-----|-----|-----|
|          |     |     |     | 111 | 111 | 111 | 122 | 222 | 222 | 223 | 333 | 333 | 333  | 444 | 444 | 444 | 455 | 555 | 555 | 556 | 666 | 666 | 666 | 777  | 777 | 777 |     |
|          | 123 | 456 | 789 | 012 | 345 | 678 | 901 | 234 | 567 | 890 | 123 | 456 | 789  | 012 | 345 | 678 | 901 | 234 | 567 | 890 | 123 | 456 | 789 | 012  | 345 | 678 |     |
| AN (AK)  | --- | --- | --- | --- | --- | --- | --- | --T | CAC | ACA | TCA | CTT | GAG  | GCC | TAC | --- | --- | --- | --- | --C | --- | --- | --- | ---  | --- | --- |     |
| AN (NK)  | --- | --- | --- | --- | --- | --- | --- | --- | ... | ... | ... | ... | ...  | ... | ... | --- | --- | --- | --- | --- | --- | --- | --- | ---  | --- | --- |     |
| AN (KT)  | --- | --- | --- | --- | --- | --- | --- | GC. | ... | ... | ... | ... | ...  | ... | --- | --- | --- | --- | --- | --T | G-- | --- | --- | ---  | --- | --- |     |
| AN (MOA) | --- | --- | --- | --- | --- | --- | --- | GC. | ... | ... | ... | ... | ...  | --- | --- | --- | --- | --- | --- | --T | T-- | --- | --- | ---  | --- | --- |     |
| AN (MOB) | --- | --- | --- | --- | --- | --- | --- | GC. | ... | ... | ... | ... | ...  | --- | --- | --- | --- | --- | --- | --T | GTA | TGT | AAC | GTG  | CCA | TGC |     |
| AN (EK)  | --- | --- | --- | --- | --- | --- | --- | GC. | ... | ... | ... | ... | ...  | --- | --- | --- | --- | --- | --- | --T | GTA | TGT | AAC | GCG  | TTC | CAT |     |
| AC (AE)  | --- | --- | --- | --- | --- | --- | --- | --- | ... | ... | ... | ... | ...  | --- | --- | --- | --- | --- | --- | --T | G-- | --- | --- | ---  | --- | --- |     |
| AO (NY)  | --- | --- | --- | --- | --- | --- | --- | --- | ... | ... | ... | ... | ...  | --- | --- | --- | A-- | --- | -TG | TAG | GTT | TCC | AAT | ATT  | TAT | ATA | TAT |
| AS (MB)  | --- | --- | --- | --- | --- | --- | --- | --- | ... | ... | ... | ... | ...  | --- | --- | --- | TGT | ATA | TTA | TGT | GTT | TGT | GTT | GGT  | GTT | CAC | GAC |
|          |     |     |     |     |     |     |     | 111 | 111 | 111 | 111 | 111 | 111  | 111 | 111 | 111 | 111 | 111 | 111 | 111 | 111 | 111 | 111 | 111  | 111 | 111 |     |
|          | 788 | 888 | 888 | 889 | 999 | 999 | 999 | 000 | 000 | 000 | 011 | 111 | 111  | 112 | 222 | 222 | 222 | 333 | 333 | 333 | 344 | 444 | 444 | 445  | 555 | 555 |     |
|          | 901 | 234 | 567 | 890 | 123 | 456 | 789 | 012 | 345 | 678 | 901 | 234 | 567  | 890 | 123 | 456 | 789 | 012 | 345 | 678 | 901 | 234 | 567 | 890  | 123 | 456 |     |
| AN (AK)  | -TA | AAG | GT- | --- | TAA | CTT | CAT | ATA | TGC | ACG | -CA | CAC | ACG  | --- | ACG | -AG | ACG | A-- | --- | --- | CGA | CCA | CGG | TCT  | TGC | -C- |     |
| AN (NK)  | -.  | ... | ..- | --- | ... | ... | ... | ... | ... | ... | --- | ... | ...  | --- | ... | ... | --- | --- | --- | --- | ... | ... | ... | ...  | ... | ..- |     |
| AN (KT)  | --G | T.. | ..- | --- | .TT | TCC | A.C | ..G | ..T | --- | -.G | T.. | ...  | --- | CTA | --- | -.T | C-- | --- | --T | ..T | ... | ... | ...  | ... | ..- |     |
| AN (MOA) | --G | T.. | ..- | --- | .TT | TCC | A.C | ..G | ..- | --- | -.G | T.. | ...  | --- | CTC | --- | -.T | C-- | --- | --T | ..T | ... | ... | ...  | ... | ..- |     |
| AN (MOB) | AC. | C.C | ..- | --- | CTC | TC. | T.C | ..G | C.T | ... | CAG | ... | ...  | --- | C.A | CTT | .TA | C-- | --- | --T | ..T | ... | ... | ...  | ... | ..- |     |
| AN (EK)  | A.G | C.C | ..- | --- | CTC | TC. | T.C | ..G | C.T | ... | CAG | ... | ...  | --- | C.. | -TT | .TA | C-- | --- | --T | .TT | ... | ... | ...  | ... | ..C |     |
| AC (AE)  | G.G | GG. | T.- | --- | CTT | ..C | TTC | TCG | .A. | ... | -A. | AG. | ..A  | --- | G.A | -CC | ... | CGC | T-- | --C | TCT | ... | ... | ...  | ... | ..T |     |
| AO (NY)  | A.. | T.T | A.- | --- | AT. | TA. | T.. | ... | .AT | .TC | AT. | A.T | .TA  | CAC | G.. | TGC | ... | CAG | CAC | GGT | .AC | .T. | ... | .TC  | .C. | A.C |     |
| AS (MB)  | AA. | C.C | T.G | GCG | .TT | .GC | AGC | .CG | .T. | ..C | A.. | ... | CA.  | CTG | CT. | CT. | CT. | GCT | GCG | TGC | TCT | .G. | T.A | G.A  | CA. | GGT |     |
|          | 111 | 111 | 111 | 111 | 111 | 111 | 111 | 111 | 111 | 111 | 111 | 111 | 111  | 111 | 122 | 222 | 222 | 222 | 222 | 222 | 222 | 222 | 222 | 222  | 222 | 222 |     |
|          | 555 | 666 | 666 | 666 | 677 | 777 | 777 | 778 | 888 | 888 | 888 | 999 | 999  | 999 | 900 | 000 | 000 | 001 | 111 | 111 | 111 | 222 | 222 | 222  | 233 | 333 |     |
|          | 789 | 012 | 345 | 678 | 901 | 234 | 567 | 890 | 123 | 456 | 789 | 012 | 345  | 678 | 901 | 234 | 567 | 890 | 123 | 456 | 789 | 012 | 345 | 678  | 901 | 234 |     |
| AN (AK)  | -AA | CCG | GC- | -GG | C-- | --- | --G | -GT | GTG | TAT | GGG | CAG | C-G  | CGC | GCA | -TC | GGC | ATT | GCG | TCG | TTC | GCA | CGC | GCG  | CGG | TGT |     |
| AN (NK)  | -.  | ... | ..- | --- | ... | ... | ... | ... | ... | ... | --- | ... | ...  | --- | ... | ... | --- | --- | --- | --- | ... | ... | ... | ...  | ... | ... |     |
| AN (KT)  | -.C | .A. | .G- | --- | --- | --- | --- | C.. | ... | ... | ... | ... | ..-  | .A. | C.. | -A. | ... | ... | ... | ... | .C. | ... | ... | ...  | ... | ... |     |
| AN (MOA) | -.C | .A. | .G- | --- | --- | --- | --- | C.. | ... | ... | ... | ... | ..-  | .A. | C.. | -A. | ... | ... | ... | ... | ... | ... | ... | ...  | ... | ... |     |
| AN (MOB) | -.C | .A. | .GA | G.. | --- | --- | --- | C.A | ... | ... | ... | ... | ..-  | .A. | C-  | -A. | ... | ... | ... | ... | ... | ... | ... | ...  | ... | ... |     |
| AN (EK)  | -.C | .A. | .GA | G.. | --- | --- | --- | C.A | ... | ... | ... | ... | ..-  | GA. | C-  | -A. | ... | ... | ... | ... | ... | ... | ... | ...  | ... | ... |     |
| AC (AE)  | C.C | .A. | .G- | -T. | ..- | --- | --- | CA. | .C. | ... | ... | ... | ..-A | ..- | ..- | -A. | ..T | ..A | ... | ... | ... | ... | ... | ..A. | ... | ..T | C.. |
| AO (NY)  | T.C | A.. | .TC | TT. | .CT | CCA | GG. | C.. | ... | ... | ... | ... | ..-  | .A. | CA. | -A. | ... | ... | ... | ... | C.. | ... | ... | ...  | ... | ... |     |
| AS (MB)  | C.T | G.A | C.A | G.. | GGT | TT- | GG. | CC. | ... | ... | ..A | ... | ..-  | .TT | CA. | CA. | ... | ..A | ... | ... | ... | ... | ... | ...  | ..T | C.. |     |

Figure S2.

|          |     |     |     |     |     |     |     |     |     |     |     |     |     |     |     |     |     |     |     |     |     |     |      |     |     |     |
|----------|-----|-----|-----|-----|-----|-----|-----|-----|-----|-----|-----|-----|-----|-----|-----|-----|-----|-----|-----|-----|-----|-----|------|-----|-----|-----|
|          | 222 | 222 | 222 | 222 | 222 | 222 | 222 | 222 | 222 | 222 | 222 | 222 | 222 | 222 | 222 | 222 | 222 | 222 | 222 | 222 | 223 | 333 | 333  | 333 | 333 |     |
|          | 333 | 334 | 444 | 444 | 444 | 555 | 555 | 555 | 566 | 666 | 666 | 667 | 777 | 777 | 777 | 888 | 888 | 888 | 899 | 999 | 999 | 990 | 000  | 000 | 000 | 111 |
|          | 567 | 890 | 123 | 456 | 789 | 012 | 345 | 678 | 901 | 234 | 567 | 890 | 123 | 456 | 789 | 012 | 345 | 678 | 901 | 234 | 567 | 890 | 123  | 456 | 789 | 012 |
| AN (AK)  | AGC | --T | CCT | AGG | G-T | TAG | GTT | ACA | CGC | GGC | GTG | CC- | --T | CGG | CGA | ACC | GTG | GCG | C-T | GCT | TGA | CAC | AGC  | CCC | CTG | GCT |
| AN (NK)  | ... | --. | ... | ... | ..  | ... | ... | ... | ... | ... | ... | ..  | --. | ... | ... | ... | ... | ..  | ... | ... | ... | ... | ...  | ... | ... | ... |
| AN (KT)  | ... | --. | ... | ... | ..  | ... | ... | ... | ... | ... | ... | ..  | --. | ... | ... | ... | ... | ..  | ... | ... | ... | ... | ..T. | ... | ..C | ... |
| AN (MOA) | ... | --. | ... | ... | ..  | ... | ... | ... | ... | ... | ... | ..  | --. | ... | ... | ... | ... | ..  | ... | ... | ... | ... | ..T. | ... | ..C | ... |
| AN (MOB) | .T. | --. | .G. | G.. | .G. | ... | ... | ... | ... | ... | ... | ..  | --. | ... | ... | ... | ... | ..  | ... | ... | ... | ... | ..T. | ... | ..C | ... |
| AN (EK)  | .T. | --. | .G. | G.. | .G. | ... | ... | ... | ... | ... | ... | ..  | --. | ... | ... | ... | ... | ..  | ... | ... | ... | ... | ..T. | ... | ..C | ... |
| AC (AE)  | .T  | --A | ... | ... | ..  | ... | .C. | ... | ... | ... | ... | ..  | --C | ..T | ... | ... | ... | .C. | ... | ... | .G. | ... | ...  | ..  | ..C | ... |
| AO (NY)  | ... | --. | ... | ... | ..A | ... | .AC | ... | ... | ... | ... | ..  | --. | ... | .A. | ... | ... | ..  | ... | ... | ... | ... | ..T. | ... | ..C | ... |
| AS (MB)  | ..T | --A | ... | ... | ..  | ... | .C. | .G. | ... | ... | ... | ..  | --. | ... | ... | ... | ... | ..  | ... | ... | ... | ... | ...  | ..  | ... | ... |
|          | 333 | 333 | 333 | 333 | 333 | 333 | 333 | 333 | 333 | 333 | 333 | 333 | 333 | 333 | 333 | 333 | 333 | 333 | 333 | 333 | 333 | 333 | 333  | 333 | 333 | 333 |
|          | 111 | 111 | 122 | 222 | 222 | 223 | 333 | 333 | 333 | 444 | 444 | 444 | 455 | 555 | 555 | 556 | 666 | 666 | 666 | 777 | 777 | 777 | 788  | 888 | 888 | 889 |
|          | 345 | 678 | 901 | 234 | 567 | 890 | 123 | 456 | 789 | 012 | 345 | 678 | 901 | 234 | 567 | 890 | 123 | 456 | 789 | 012 | 345 | 678 | 901  | 234 | 567 | 890 |
| AN (AK)  | GCT | TCT | CGT | GGC | GCG | GTG | CGC | GTG | CCT | --- | GCT | CCT | TCG | CAT | GTT | ATG | CTC | TCT | TCA | GC- | GCC | CCG | GGG  | TGG | T-- | -AA |
| AN (NK)  | ... | ... | ... | ... | ... | ... | ... | ... | ... | --- | ... | ... | ... | ... | ... | ... | ... | ..  | ... | ... | ... | ... | ...  | ... | --- | --- |
| AN (KT)  | ... | ... | ... | ... | --- | --- | ... | ... | ..C | --- | .A. | ... | ... | ... | ... | C.. | --. | ... | ... | ..  | ... | ... | ...  | --- | --- | --- |
| AN (MOA) | ... | ... | ... | ... | --- | --- | ... | ... | ..C | --- | .A. | ... | ... | ... | ... | C.. | --. | .T. | ... | ..  | ... | ... | ...  | --- | --- | --- |
| AN (MOB) | ... | ... | ... | ... | --- | --- | ... | ... | ..C | --- | .A. | ... | ... | ... | ..G | T.. | --. | ... | ... | ..  | ... | ... | ...  | --- | --- | --- |
| AN (EK)  | ... | ... | ... | ... | --- | --- | ... | ... | ..C | --- | .A. | ... | ... | ... | ..G | T.. | --. | ... | ... | ..  | ... | ... | ...  | --- | --- | --- |
| AC (AE)  | ... | ... | ... | ... | --- | --- | ... | ... | ..C | A-- | .T. | ... | ... | ... | ..G | T.. | --. | ... | ... | ..  | ... | ... | ...  | --- | --- | --- |
| AO (NY)  | ... | ... | ... | ... | --- | --- | ... | .C. | ..C | G-- | ATC | .T. | CG. | ... | ... | GC. | --. | ... | ... | ..A | ... | ... | ...  | --- | --- | --- |
| AS (MB)  | ... | ... | ... | ... | .GT | .C. | .A. | ... | ..C | GAT | AAC | .T. | CTT | .GC | A.. | G.T | G-  | ... | ... | ..G | C.. | .G. | ...  | ... | A-- | --- |
|          | 333 | 333 | 333 | 444 | 444 | 444 | 444 | 444 | 444 | 444 | 444 | 444 | 444 | 444 | 444 | 444 | 444 | 444 | 444 | 444 | 444 | 444 | 444  | 444 | 444 | 444 |
|          | 999 | 999 | 999 | 000 | 000 | 000 | 011 | 111 | 111 | 112 | 222 | 222 | 222 | 333 | 333 | 333 | 344 | 444 | 444 | 445 | 555 | 555 | 555  | 666 | 666 | 666 |
|          | 123 | 456 | 789 | 012 | 345 | 678 | 901 | 234 | 567 | 890 | 123 | 456 | 789 | 012 | 345 | 678 | 901 | 234 | 567 | 890 | 123 | 456 | 789  | 012 | 345 | 678 |
| AN (AK)  | GTG | --- | --- | --- | -AC | CG- | CCC | CAG | CAC | GCC | ATG | CTG | C-G | CTC | GTG | --- | -TG | CTG | TCA | CAC | AA- | --- | -CA  | ACA | CGA | GCA |
| AN (NK)  | ... | --- | --- | --- | ... | ..  | ... | ... | ... | ... | ... | ... | ..  | ... | ... | --- | ... | ... | ..  | --- | --- | ... | ...  | ... | ... | ... |
| AN (KT)  | ... | --- | --- | --- | ... | ..A | ... | ... | ... | ... | ... | ..  | ... | ... | ... | GCA | C.C | .C. | .GT | GTT | GGG | CGC | A.C  | .GC | ... | ... |
| AN (MOA) | ... | --- | --- | --- | ... | ..A | ... | ... | ... | ... | ... | ..  | ... | ... | ... | GCA | C.C | .C. | .GT | GTT | GGG | CGT | A.C  | .GC | ... | ... |
| AN (MOB) | ... | --- | --- | --- | ... | ..  | ... | ... | ... | ... | ... | ..  | ... | ... | ... | GCA | C.C | .C. | .GT | GT. | GGG | CGT | A.C  | GGC | ... | ... |
| AN (EK)  | ... | --- | --- | --- | ... | ..  | ... | ... | ... | ... | ... | ..  | ... | ... | ... | GCG | CAC | .C. | .GT | GT. | GGG | CGT | A.C  | GGC | ... | ... |
| AC (AE)  | ... | TTG | TAA | CCT | G.. | .C- | ... | ... | ... | ... | ... | ..  | T.  | ... | ... | GTG | A.. | A.. | C.. | AG. | CGG | CC- | ..C  | ..C | ... | ... |
| AO (NY)  | ... | --- | --- | --- | ... | ..  | ... | .G. | ... | ... | ... | ..  | ... | ... | ... | GCA | CCC | .C. | .GT | GGT | GGG | CGT | A.C  | .GC | ... | ... |
| AS (MB)  | C.. | --- | --- | --- | ... | ..  | ... | ... | ... | ... | ... | ..  | ... | ... | --- | --- | --. | CGT | AG. | CG- | --- | ..C | .TC  | ... | ... | ... |

Figure S2 (continued).

|          |     |     |      |      |     |      |     |      |     |     |     |     |     |     |     |     |     |     |     |     |     |     |     |     |     |     |     |     |
|----------|-----|-----|------|------|-----|------|-----|------|-----|-----|-----|-----|-----|-----|-----|-----|-----|-----|-----|-----|-----|-----|-----|-----|-----|-----|-----|-----|
|          | 444 | 444 | 444  | 444  | 444 | 444  | 444 | 444  | 444 | 444 | 455 | 555 | 555 | 555 | 555 | 555 | 555 | 555 | 555 | 555 | 555 | 555 | 555 | 555 | 555 | 555 | 555 | 555 |
|          | 677 | 777 | 777  | 778  | 888 | 888  | 888 | 999  | 999 | 999 | 900 | 000 | 000 | 001 | 111 | 111 | 111 | 222 | 222 | 222 | 233 | 333 | 333 | 334 | 444 | 444 |     |     |
|          | 901 | 234 | 567  | 890  | 123 | 456  | 789 | 012  | 345 | 678 | 901 | 234 | 567 | 890 | 123 | 456 | 789 | 012 | 345 | 678 | 901 | 234 | 567 | 890 | 123 | 456 |     |     |
| AN (AK)  | GTC | TGA | GC-  | ---- | --C | AAC  | GCT | T--  | GTC | TCA | ACA | ATT | GAG | TAG | GCA | CTC | AAG | AAT | GTG | TGC | ATC | GGG | CGG | GTT | GAA | GCG |     |     |
| AN (NK)  | ... | ... | ..-  | ---- | --. | ...  | ... | ---  | ... | ... | ... | ... | ... | ... | ... | ... | ... | ... | ... | ... | ... | ... | ... | ... | ... | ... | ... | ... |
| AN (KT)  | ... | ... | ..C  | ---- | -AT | --A  | ... | ---  | ..C | ... | ... | ... | ... | ... | ... | ... | ... | ... | ... | ... | ... | ... | ... | ... | ... | ... | ... | ... |
| AN (MOA) | ... | ... | ..TC | ---- | -AT | ..TA | ... | ---  | ..C | ... | ... | ... | ... | ... | ... | ... | ... | ... | ... | ... | ... | ... | ... | ... | ... | ... | ... | ... |
| AN (MOB) | ... | ... | ..C  | ---- | -AT | ..G  | ... | ---  | ..C | ... | ... | ... | ... | ... | ... | ... | ... | ... | ... | ... | ... | ... | ..T | ... | ... | ... | ... | A.. |
| AN (EK)  | ... | ... | ..C  | ---- | -AT | T-G  | ... | ---  | ..C | ... | ... | ... | ... | ... | ... | ... | ... | ... | ... | ... | ... | ... | ... | ... | ... | ... | ... | ... |
| AC (AE)  | ... | ... | ..TG | TGT  | AGT | ..G. | AT. | ..TT | ... | ... | ... | ..C | ... | ... | ... | ... | ... | ... | ... | ... | ... | ... | ... | ... | ... | ... | ... | ... |
| AO (NY)  | ... | ... | ..-  | ---- | --. | ..TA | ... | ---  | ..C | ... | ... | ... | ... | ... | ... | ... | ... | ... | ... | ... | ... | ... | ... | ... | ... | ... | ... | ... |
| AS (MB)  | ... | ... | ..G  | CGC  | AAT | G-A  | ... | ---  | ..C | ... | ... | ... | ... | ... | ... | ... | ... | ... | ... | ... | ... | ... | ... | ... | ... | ... | ... | ... |
|          | 555 | 555 | 555  | 555  | 555 | 555  | 555 | 555  | 555 | 555 | 555 | 555 | 5   |     |     |     |     |     |     |     |     |     |     |     |     |     |     |     |
|          | 444 | 555 | 555  | 555  | 566 | 666  | 666 | 667  | 777 | 777 | 777 | 888 | 8   |     |     |     |     |     |     |     |     |     |     |     |     |     |     |     |
|          | 789 | 012 | 345  | 678  | 901 | 234  | 567 | 890  | 123 | 456 | 789 | 012 | 3   |     |     |     |     |     |     |     |     |     |     |     |     |     |     |     |
| AN (AK)  | TCC | GAT | GCG  | CCA  | TAT | GCG  | TT- | CAA  | CGT | GTC | GGT | GTT | C   |     |     |     |     |     |     |     |     |     |     |     |     |     |     |     |
| AN (NK)  | ... | ... | ...  | ...  | ... | ...  | ..- | ...  | ... | ... | ... | ... | .   |     |     |     |     |     |     |     |     |     |     |     |     |     |     |     |
| AN (KT)  | ... | ... | ...  | ...  | ... | ...  | ..- | ...  | ... | ... | ... | ... | .   |     |     |     |     |     |     |     |     |     |     |     |     |     |     |     |
| AN (MOA) | ... | ... | ...  | ...  | ... | ...  | ..- | ...  | ... | ... | ... | ... | .   |     |     |     |     |     |     |     |     |     |     |     |     |     |     |     |
| AN (MOB) | ... | ... | ...  | ...  | ... | ...  | ..- | ...  | ... | ... | ... | ... | .   |     |     |     |     |     |     |     |     |     |     |     |     |     |     |     |
| AN (EK)  | ... | ... | ...  | ...  | ... | ...  | ..- | ...  | ... | ... | ... | ... | .   |     |     |     |     |     |     |     |     |     |     |     |     |     |     |     |
| AC (AE)  | ... | ... | ...  | ...  | ... | ...  | ..- | ...  | ... | ... | ... | ... | .   |     |     |     |     |     |     |     |     |     |     |     |     |     |     |     |
| AO (NY)  | -.. | ... | ..A  | ...  | ... | ...  | ..- | ...  | ... | ... | ... | ... | .   |     |     |     |     |     |     |     |     |     |     |     |     |     |     |     |
| AS (MB)  | ... | ... | ...  | ...  | ... | ...  | ..- | ...  | ... | ..- | ... | ... | .   |     |     |     |     |     |     |     |     |     |     |     |     |     |     |     |

**Figure S2 (continued).**
